# Supplementary material for: Sensory Metabolite Profiling in a Date Pit Based Coffee Substitute and in Response to Roasting as Analyzed via Mass Spectrometry Based Metabolomics
Source: PubMed Central journal article supplement (PMC6767185; doi:10.3390/molecules24183377), 2019-09-17
Supplement: molecules-24-03377-s001.pdf [file molecules-24-03377-s001.pdf]

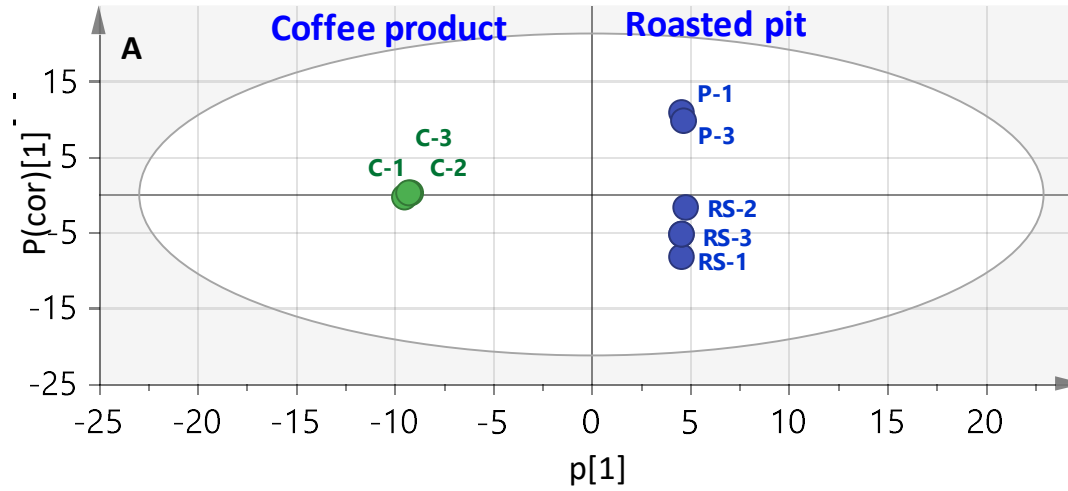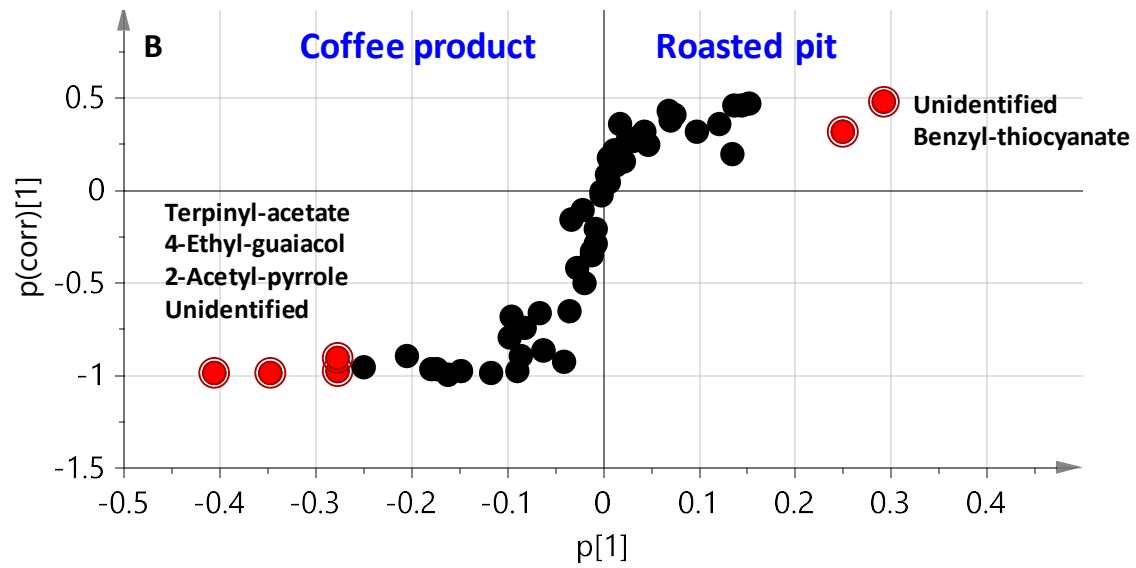

**Figure 1.** A. OPLS-DA score plot and B. loading S-plots derived from coffee (C) samples ( ) modelled against roasted pit samples *i.e.*, roasted pit (RS) and products (P) ( ) analysed by SPME-GCMS ( $n=3$ ). The S-plot showing the covariance  $p[1]$  against the correlation  $p(\text{cor})[1]$  of the variables of the discriminating component of the OPLS-DA model. Cut-off values of  $P<0.05$  were used; variables selected are highlighted in the S-plot and identifications are discussed in the text.

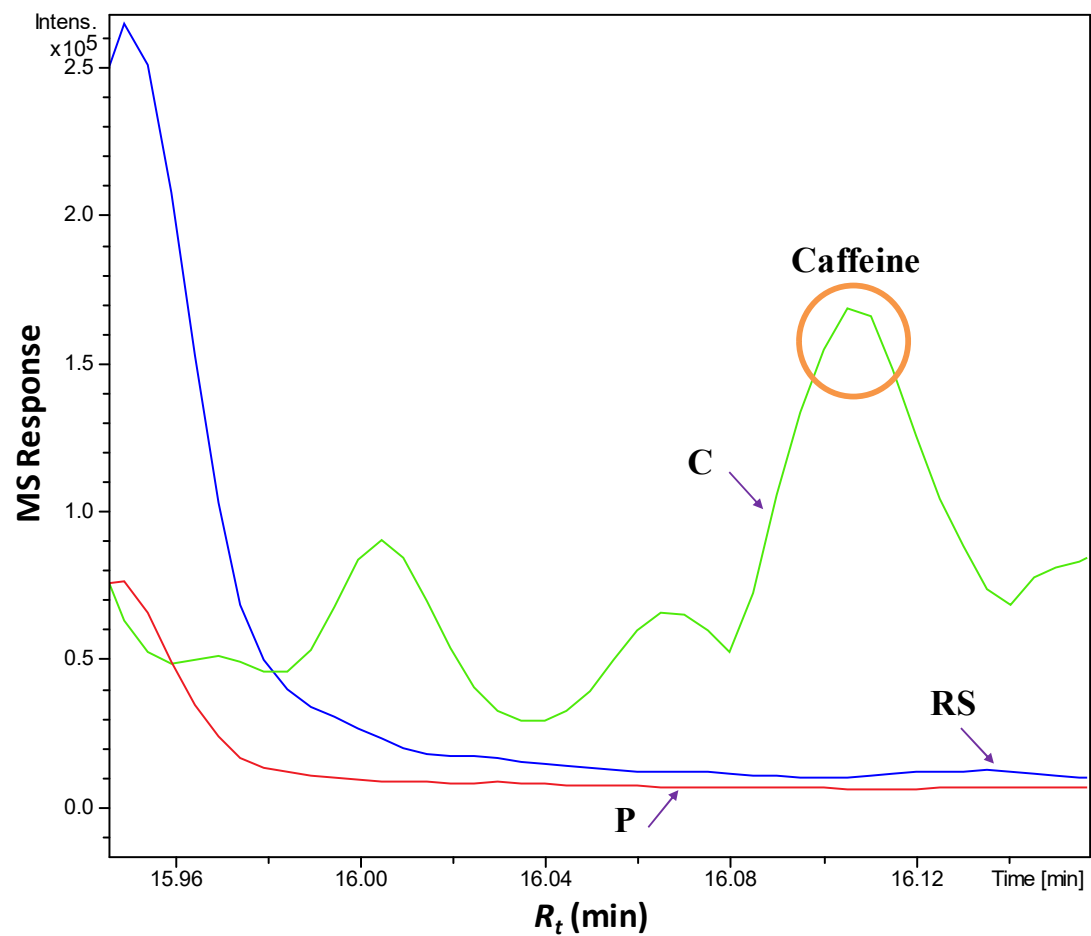

**Figure 2.** Representative GCMS-post silylation overlaid chromatograms ( $R_t$ : 15.9-16.2 min) showing the absence of caffeine in roasted pit (RS) and pit product (P) samples, (caffeine, peak (S27), is detected at  $R_t$ : 16.10 min).

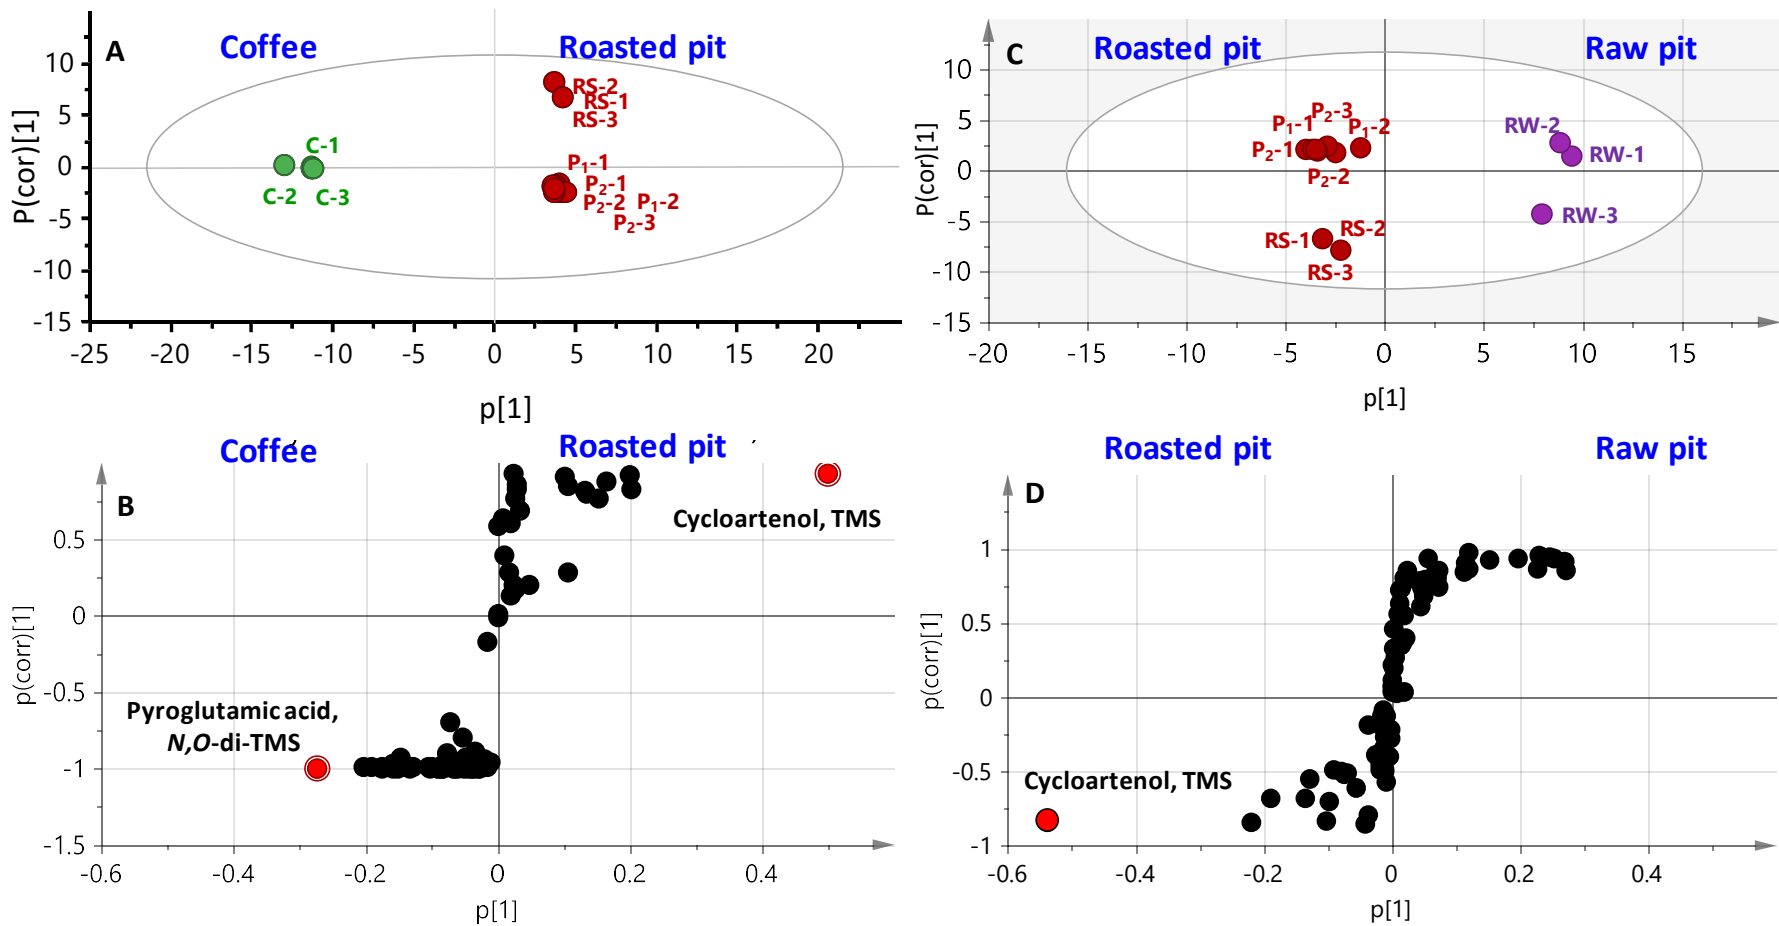

**Figure 3.** A. OPLS-DA score plot and B. loading S-plots derived from coffee samples ( ) modelled against roasted pit samples (RS, P<sub>1</sub>, and P<sub>2</sub>) ( ) analysed by GCMS-post silylation ( $n=3$ ). C. OPLS-DA score plot and D. loading S-plots derived from raw pit samples ( ) modelled against roasted pit samples (RS, P<sub>1</sub>, and P<sub>2</sub>) ( ) analysed by GCMS-post silylation ( $n=3$ ). The S-plot shows the covariance  $p[1]$  against the correlation  $p(\text{corr})[1]$  of the variables of the discriminating component of the OPLS-DA model. Cut-off values of  $P<0.05$  were used; variables selected are highlighted in the S-plot and identifications are discussed in the text.

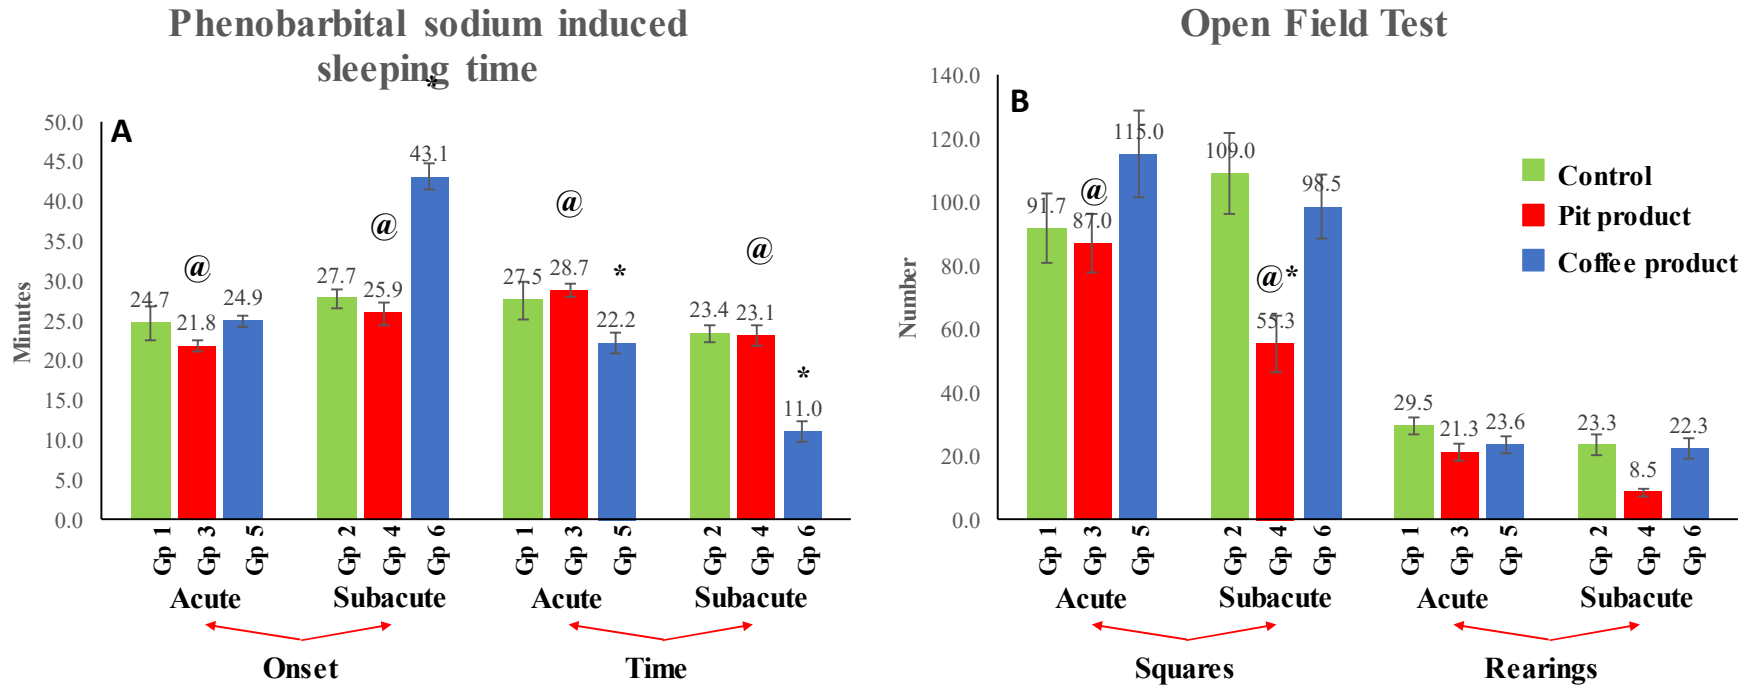

**Figure 4.** A. Effect of date pit product (P<sub>1</sub>) and coffee product (C) extracts on the onset and duration of sleep time during phenobarbital sodium induced sleeping test. B. Effect of date pit product (P<sub>1</sub>) and coffee product (C) extracts on the onset and duration of sleep time during phenobarbital sodium induced sleeping test. Each bar represents mean ± S.E. (n =10); \*Significant from control, @ significant from reference coffee extract (P ≤ 0.05, two-way ANOVA followed by Bonferroni post hoc test).

**Table 1.** Effect of date pit product (P) and coffee product (C) extracts on the onset and duration of sleep time during phenobarbital sodium induced sleeping test. Each bar represents mean  $\pm$  S.E. ( $n = 6$ ); \*Significant from control, @ significant from reference coffee extract ( $P \leq 0.05$ , two-way ANOVA followed by Bonferroni post hoc test).

| Group | Onset time (min)    | Sleeping time (min) |
|-------|---------------------|---------------------|
| 1     | 24.714 $\pm$ 2.133  | 27.543 $\pm$ 2.387  |
| 2     | 27.741 $\pm$ 1.257  | 23.4 $\pm$ 1.028    |
| 3     | 21.754 $\pm$ 0.639@ | 28.688 $\pm$ 0.833@ |
| 4     | 25.91 $\pm$ 1.43@   | 23.126 $\pm$ 1.27@  |
| 5     | 24.93 $\pm$ 0.744   | 22.152 $\pm$ 1.298* |
| 6     | 43.057 $\pm$ 1.553* | 10.983 $\pm$ 1.358* |

**Table 2.** Effect of date pit product (P) and coffee product (C) on the number of squares crossed by mice and number of rearing during Open Field Test. Each bar represents mean  $\pm$  S.E. ( $n = 6$ ); \*Significant from control, @ significant from reference coffee extract ( $P \leq 0.05$ , two-way ANOVA followed by Bonferroni post hoc test).

| Group | Number of squares crossed | Number of rearings |
|-------|---------------------------|--------------------|
| 1     | 91.66 $\pm$ 11.039        | 29.50 $\pm$ 2.940  |
| 2     | 109.0 $\pm$ 12.816        | 23.33 $\pm$ 3.218  |
| 3     | 87.00 $\pm$ 9.19@         | 21.33 $\pm$ 2.260  |
| 4     | 55.33 $\pm$ 8.864@*       | 8.5 $\pm$ 1.202    |
| 5     | 115.0 $\pm$ 13.51         | 23.6 $\pm$ 2.870   |
| 6     | 98.5 $\pm$ 10.233690      | 22.25 $\pm$ 3.201  |
